## CORRECTION

# Correction: Protocol for a mobile laboratory study of co-administration of cannabis concentrates with a standard alcohol dose in humans

Hollis C. Karoly, Mark A. Prince, Noah N. Emery, Emma E. Smith, Cianna J. Piercey, Carrie Cuttler, Bradley T. Conner

Carrie Cuttler should be included in the author byline. Carrie Cuttler should be listed as the sixth author, and his affiliation is 2: Department of Psychology, Washington State University. The contributions of this author are as follows: conceptualized ideas, developed or designed a methodology, contributed reagents/materials/analysis tools, provided activity planning and execution for the research.

The correct citation is: Karoly HC, Prince MA, Emery NN, Smith EE, Piercey CJ, Cuttler C (2022) Protocol for a mobile laboratory study of co-administration of cannabis concentrates with a standard alcohol dose in humans. PLoS ONE 17(11): e0277123. <https://doi.org/10.1371/journal.pone.0277123>

## Reference

1. Karoly HC, Prince MA, Emery NN, Smith EE, Piercey CJ, Conner BT. Protocol for a mobile laboratory study of co-administration of cannabis concentrates with a standard alcohol dose in humans. PLoS One. 2022;17(11): e0277123. <https://doi.org/10.1371/journal.pone.0277123> PMID: [36327298](https://pubmed.ncbi.nlm.nih.gov/36327298/)

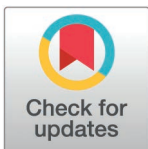

## OPEN ACCESS

**Citation:** Karoly HC, Prince MA, Emery NN, Smith EE, Piercey CJ, Cuttler C et al (2025) Correction: Protocol for a mobile laboratory study of co-administration of cannabis concentrates with a standard alcohol dose in humans. PLoS ONE 20(4): e0322401. <https://doi.org/10.1371/journal.pone.0322401>

**Published:** April 8, 2025

**Copyright:** © 2025 Karoly et al. This is an open access article distributed under the terms of the [Creative Commons Attribution License](https://creativecommons.org/licenses/by/4.0/), which permits unrestricted use, distribution, and reproduction in any medium, provided the original author and source are credited.
